# Supplementary material
Source: PubMed Central journal article supplement (PMC3871989)
Supplement: NIHMS479048-supplement-Supp_Fig_S1-S5.pdf [file NIHMS479048-supplement-Supp_Fig_S1-S5.pdf]

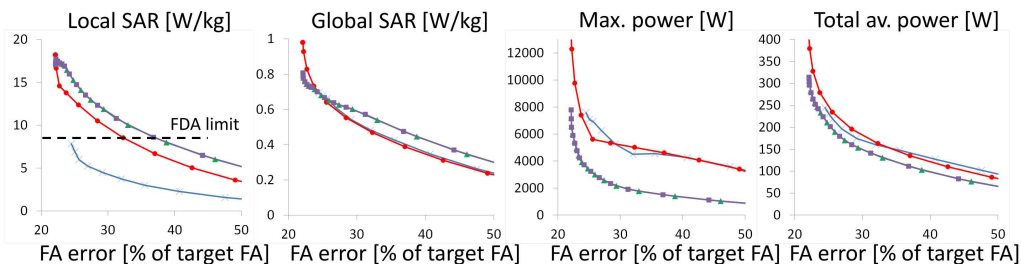

### A. RF shimming (torso at 3 T, flat target phase)

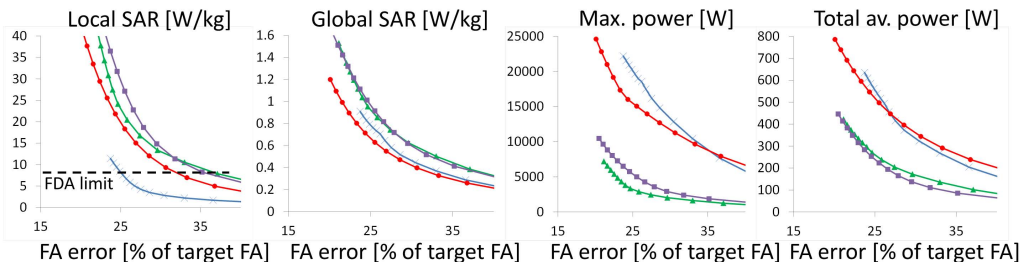

### B. 2-spokes (torso at 3 T, flat target phase)

- ✖ Local SAR limit is varied. No global SAR and power constraints.
- Global SAR limit is varied. No local SAR and power constraints.
- ▲ Max. power limit is varied. No av. power and SAR constraints.
- Av. power limit is varied. No max. power and SAR constraints.

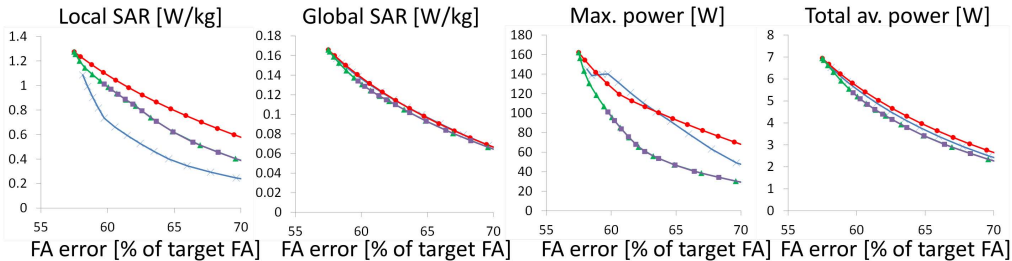

### A. RF shimming (head at 7 T, flat target phase)

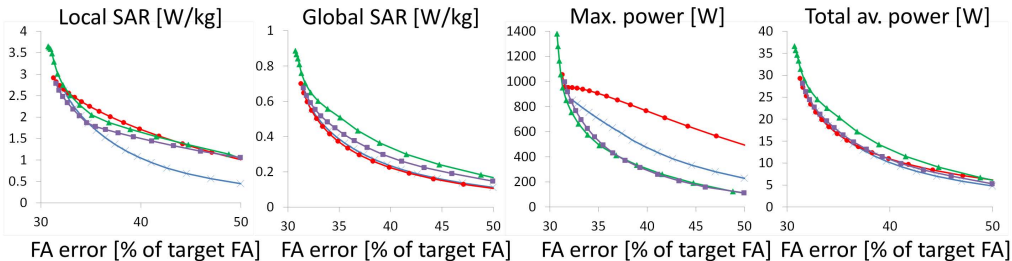

### B. 2-spokes (head at 7 T, flat target phase)

- ✖ Local SAR limit is varied. No global SAR and power constraints.
- Global SAR limit is varied. No local SAR and power constraints.
- ▲ Max. power limit is varied. No av. power and SAR constraints.
- Av. power limit is varied. No max. power and SAR constraints.

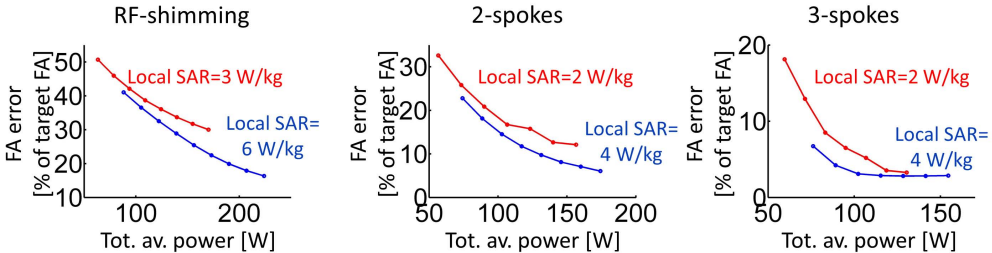

**A. Torso at 3 T**

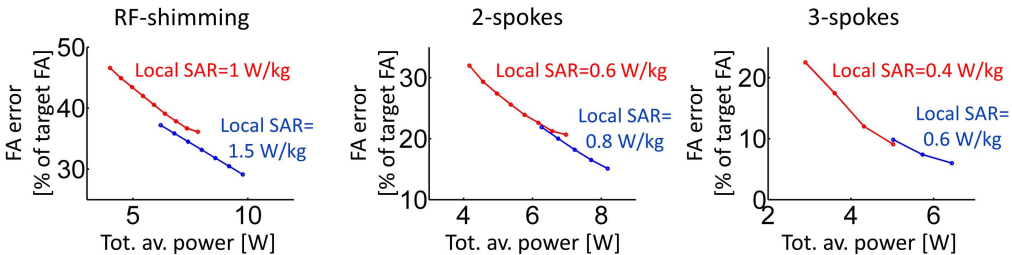

**B. Head at 7 T**

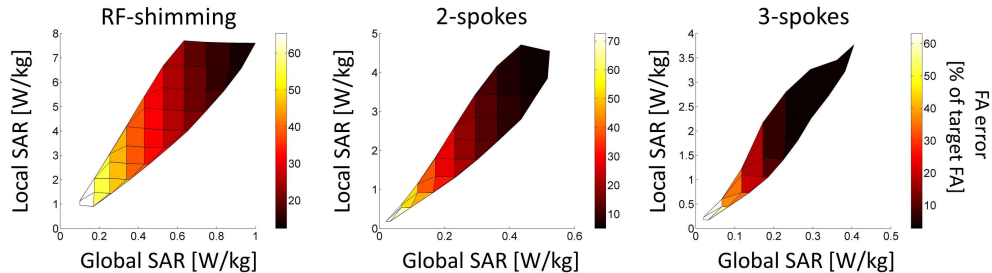

**A. Torso at 3 T**

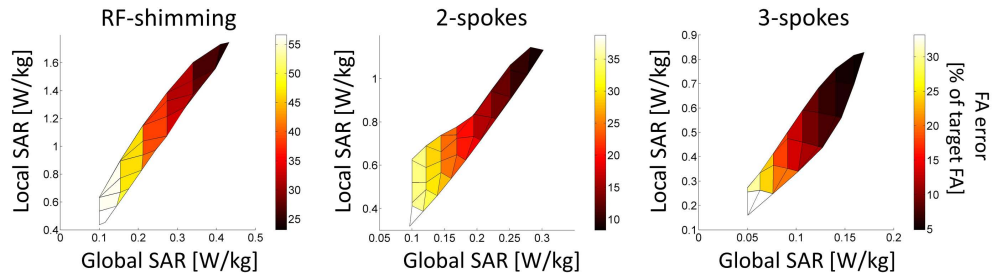

**B. Head at 7 T**

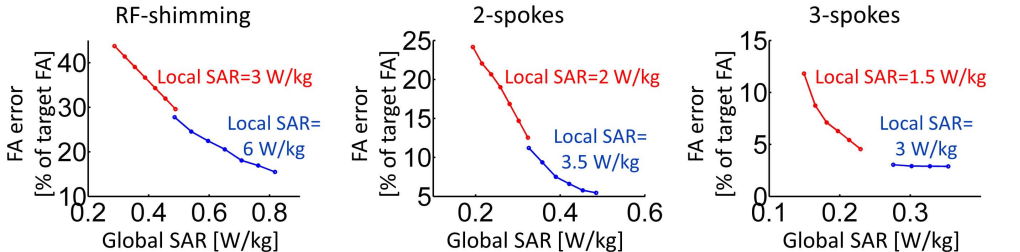

**A. Torso at 3 T**

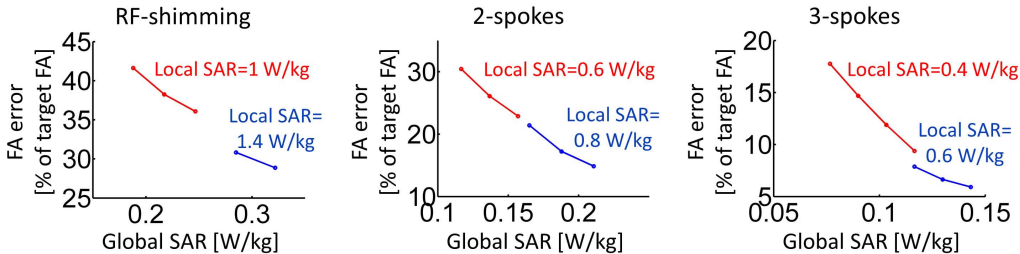

**B. Head at 7 T**
